# Supplementary material for: Spatiotemporal Gradients of PAH Concentrations in Greek Cities and Associated Exposure Impacts
Source: MDPI journal article supplement (doi:10.3390/toxics12040293), 2024-04-16
Supplement: s1 [file s1]

# Spatiotemporal gradients of PAH concentrations in Greek cities and associated exposure impacts

I. Tsiodra<sup>1</sup>, K. Tavernaraki<sup>1,2</sup>, G. Grivas<sup>1</sup>, C. Parinos<sup>3</sup>, K. Papoutsidaki<sup>2</sup>, D. Paraskevopoulou<sup>1,2</sup>, E. Liakakou<sup>1</sup>, A. Gogou<sup>3</sup>, A. Bougiatioti<sup>1\*</sup>, E. Gerasopoulos<sup>1</sup>, M. Kanakidou<sup>2,4,5</sup>, and N. Mihalopoulos<sup>1,2</sup>

<sup>1</sup> Institute for Environmental Research and Sustainable Development, National Observatory of Athens, P. Penteli, 15236, Greece

<sup>2</sup> Environmental Chemical Processes Laboratory, Department of Chemistry, University of Crete, Heraklion, Crete

<sup>3</sup> Institute of Oceanography, Hellenic Centre for Marine Research, Anavyssos, 19013, Greece

<sup>4</sup> Center for Studies of Air Quality and Climate Change, Institute for Chemical Engineering Sciences, Foundation for Research and Technology Hellas, Patras, Greece

<sup>5</sup> Institute of Environmental Physics, University of Bremen, Bremen, Germany

\* Correspondence: abougiat@noa.gr (A.B.)

Supplement

Tables: 3

Pages: 5

Figures: 5

-

Table S1: Statistical significance of seasonal differences in  $\Sigma_{16}$ PAH concentrations measured at each site.

Table S2: Statistical significance of inter-site differences in  $\Sigma_{16}$ PAH concentrations during the warm season.

Table S3: Statistical analysis between the OC/EC ratios during winter and summer at each site.

Figure S1:  $\Sigma_{16}$ -EPA PAHs and  $\Sigma_6$ -EU PAHs mean concentrations at the six sampling sites (blue color for winter values; yellow for summer).

Figure S2: Selected wind plots for Piraeus in summer (a), Xanthi in winter (b) and Volos in summer (c), associating wind direction with  $\Sigma_{16}$ PAH concentration ( $\text{ng m}^{-3}$ ). The color scale indicates  $\Sigma_{16}$ PAH levels and the radial axis shows their frequency of appearance by direction.

Figure S3: PAH mean concentrations by member during winter (left) and summer (right) periods.

Figure S4: Distribution of diagnostic ratio values calculated at the six sites.

Figure S5: Seasonal variability of the relative contributions on LMW, MMW and HMW PAHs groups at the six sites.

**Table S1.** Statistical significance of seasonal differences in  $\Sigma_{16}$ PAH concentrations measured at each site.

|                  | <i>P-value</i> |
|------------------|----------------|
| <b>Athens</b>    | 7.68E-06       |
| <b>Piraeus</b>   | 3.94E-05       |
| <b>Ioannina</b>  | 3.93E-07       |
| <b>Volos</b>     | 9.89E-12       |
| <b>Xanthi</b>    | 1.63E-05       |
| <b>Heraklion</b> | 1.29E-03       |

Displayed *p*-values are derived by t-tests, and indicate statistical significance at the 99% confidence level in all cases.

**Table S2.** Statistical significance of inter-site differences in  $\Sigma_{16}$ PAH concentrations during the warm season.

|                  | <b>Athens</b> | <b>Piraeus</b> | <b>Ioannina</b> | <b>Volos</b> | <b>Xanthi</b> | <b>Heraklion</b> |
|------------------|---------------|----------------|-----------------|--------------|---------------|------------------|
| <b>Athens</b>    |               | 0.036          | 0.009           | <b>0.400</b> | 0.007         | 0.095            |
| <b>Piraeus</b>   | 0.036         |                | 0.007           | 0.067        | 0.007         | 0.012            |
| <b>Ioannina</b>  | 0.009         | 0.007          |                 | 0.001        | <b>0.953</b>  | 0.033            |
| <b>Volos</b>     | <b>0.400</b>  | 0.067          | 0.001           |              | 0.001         | 0.010            |
| <b>Xanthi</b>    | 0.007         | 0.007          | <b>0.953</b>    | 0.001        |               | 0.011            |
| <b>Heraklion</b> | 0.095         | 0.012          | 0.033           | 0.010        | 0.011         |                  |

Displayed *p*-values are derived by t-tests. It is apparent that mean concentrations between the sites are significantly different ( $p < 0.10$ ), apart from Xanthi-Ioannina, and similarities also exist between Volos-Athens. The results are also verified by analysis of variance (ANOVA) that indicates statistical significant variation ( $p < 0.01$ ) when all six sites are considered, but not when examining smaller subsets that include Ioannina and Xanthi ( $p > 0.05$ ).

**Table S3.** Statistical analysis between the OC/EC ratios during winter and summer at each site.

|                  | <i>OC/EC<br/>winter</i> | <i>OC/EC<br/>summer</i> | <i>P-value</i>  |
|------------------|-------------------------|-------------------------|-----------------|
| <b>Athens</b>    | 4.06                    | 3.01                    | 7.56E-03        |
| <b>Piraeus</b>   | 3.09                    | 3.62                    | <b>3.13E-01</b> |
| <b>Ioannina</b>  | 9.79                    | 6.99                    | 2.19E-04        |
| <b>Volos</b>     | 8.99                    | 3.25                    | 6.39E-07        |
| <b>Xanthi</b>    | 8.99                    | 21.17                   | 6.25E-13        |
| <b>Heraklion</b> | 3.68                    | 6.05                    | 1.35E-02        |

It is apparent that average levels between winter and summer at all the sites are significantly different ( $p < 0.05$ ), apart from the site of Piraeus, due to the additional primary sources linked to traffic/shipping during summer.

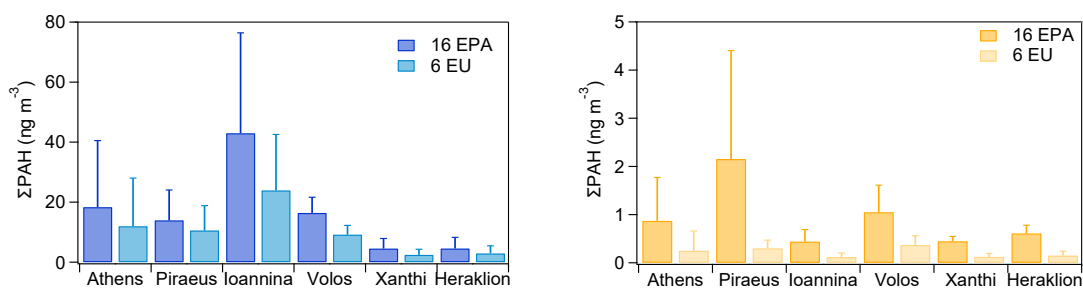

**Figure S1.**  $\Sigma_{16}$ -EPA PAHs and  $\Sigma_6$ -EU PAHs mean concentrations at the six sampling sites (blue color for winter values; yellow for summer).

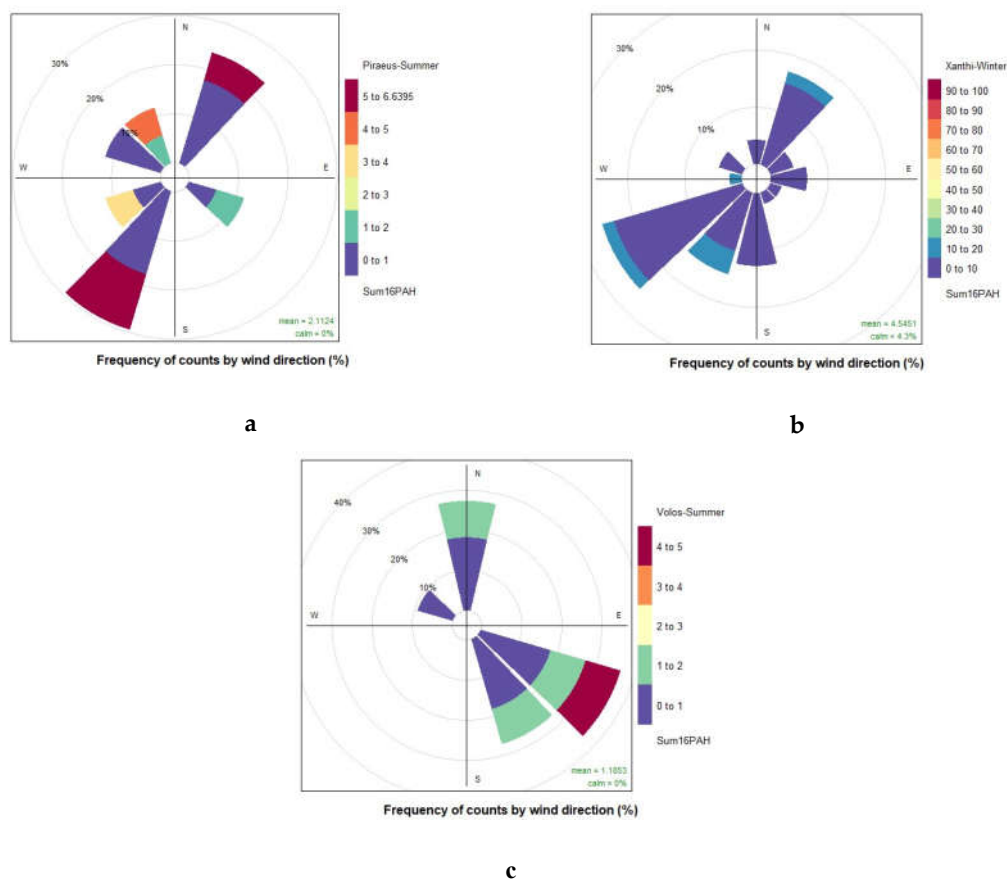

**Figure S2.** Selected wind plots for Piraeus in summer (a), Xanthi in winter (b) and Volos in summer (c), associating wind direction with  $\Sigma_{16}$ PAH concentration (ng m<sup>-3</sup>). The color scale indicates  $\Sigma_{16}$ PAH levels and the radial axis shows their frequency of appearance by direction.

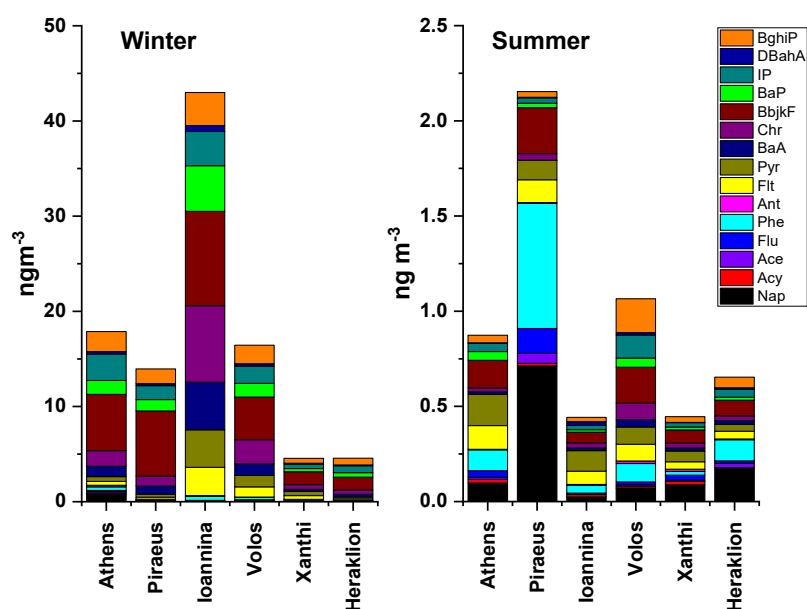

**Figure S3.** PAH mean concentrations by member during winter (left) and summer (right) periods.

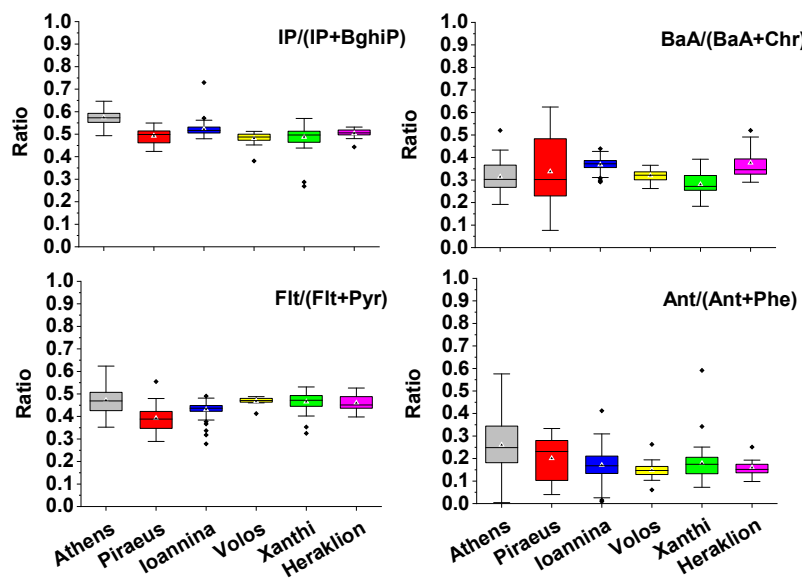

**Figure S4.** Distribution of diagnostic ratio values calculated at the six sites.

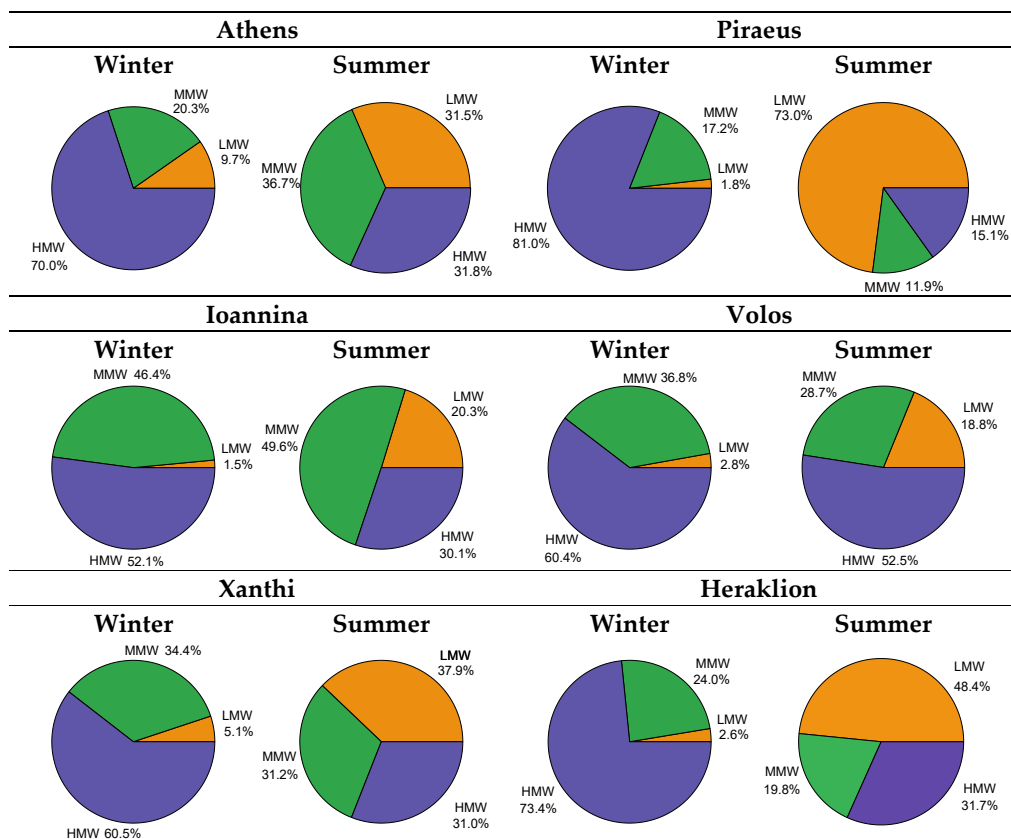

**Figure S5.** Seasonal variability of the relative contributions on LMW, MMW and HMW PAHs groups at the six sites.
